# Supplementary material for: Moderators of School-Based Physical Activity Interventions on Cardiorespiratory Endurance in Primary School-Aged Children: A Meta-Regression
Source: MDPI journal article supplement (doi:10.3390/ijerph15081764), 2018-08-16
Supplement: s1 [file s1]

**Table S1.** Filled studies from the Trim and Fill methodology.

|        | Fixed Effects Weight | Random Effects Weight | SMD   | 95% CI       |
|--------|----------------------|-----------------------|-------|--------------|
| Fill 1 | 27.6                 | 8.3                   | -0.95 | -1.32, -0.57 |
| Fill 2 | 47.3                 | 9.5                   | -0.82 | -1.10, -0.53 |
| Fill 3 | 18.6                 | 7.3                   | -0.54 | -1.00, -0.09 |
| Fill 4 | 27.2                 | 8.3                   | -0.42 | -0.80, -0.05 |
| Fill 5 | 44.8                 | 9.4                   | -0.34 | -0.63, -0.04 |
| Fill 6 | 86.1                 | 10.4                  | -0.26 | -0.47, -0.05 |
| Fill 7 | 36.9                 | 9.00                  | -0.20 | -0.52, 0.13  |

*Note:* SMD stands for standardized mean difference; 95% CI stands for 95% Confidence Interval.
